# Supplementary material for: Prognostic value of immune cell infiltration in bladder cancer: A gene expression-based study
Source: PubMed Central journal article supplement — Oncol Lett. 2020 Jun 17;20(2):1677–84. doi: 10.3892/ol.2020.11750 (PMC7377040; doi:10.3892/ol.2020.11750), 2020-06-17

Figure S1. Kaplan-Meier survival curves of tumour-infiltrating immune cells subpopulations. NK, natural killer; Treg, T cells regulatory.

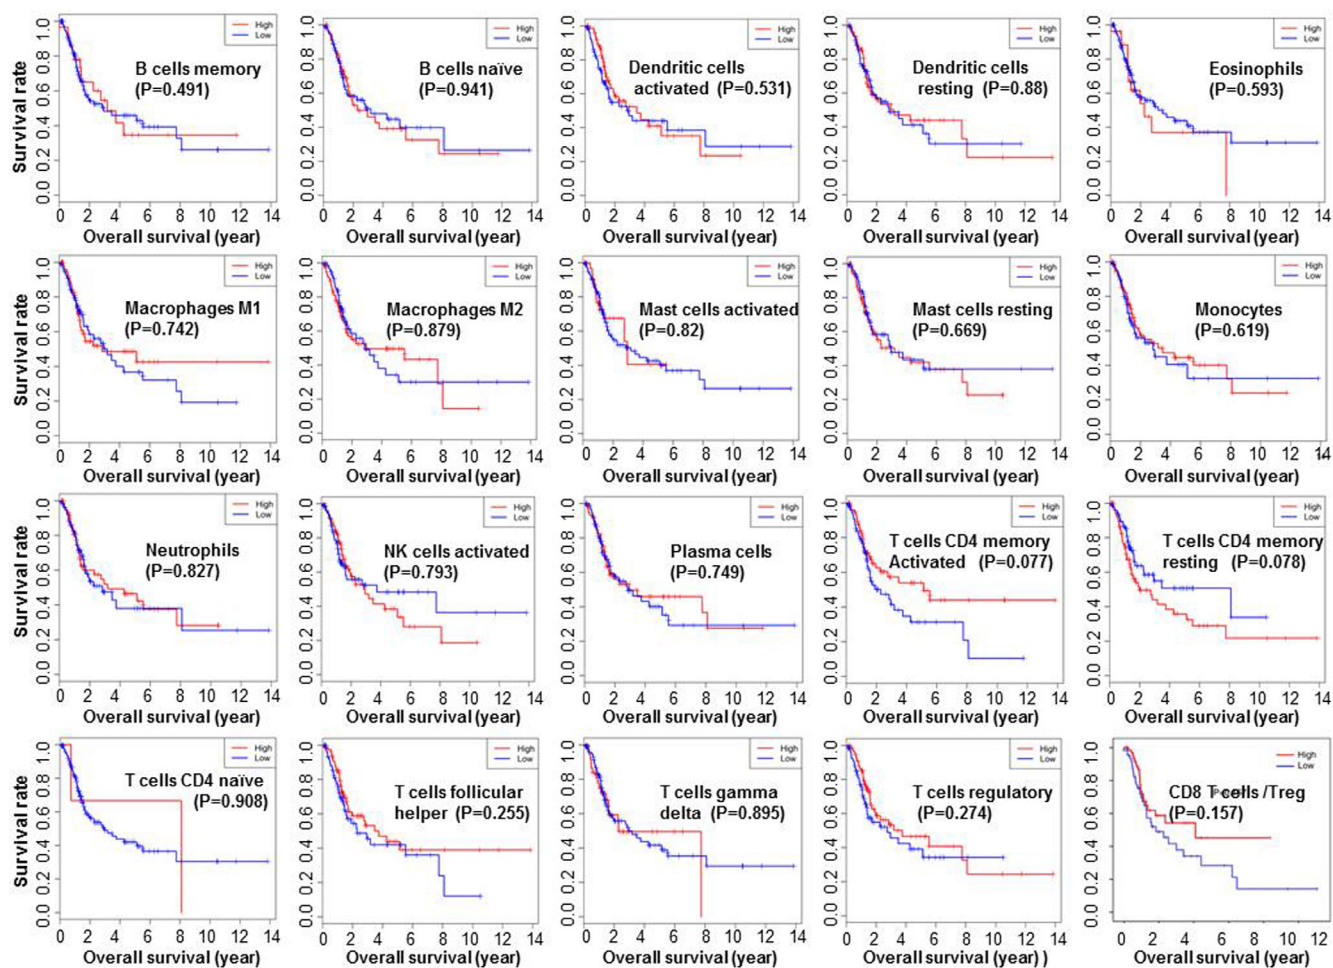

Supplement: Supplementary_Data.pdf [file Supplementary_Data.pdf]
